# Supplementary material for: TRIM25 promotes Capicua degradation independently of ERK in the absence of ATXN1L
Source: PubMed Central journal article supplement (PMC7594423; doi:10.1186/s12915-020-00895-0), 2020-10-28

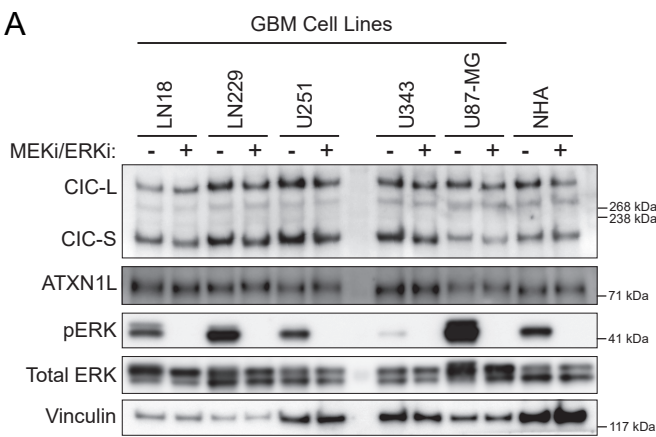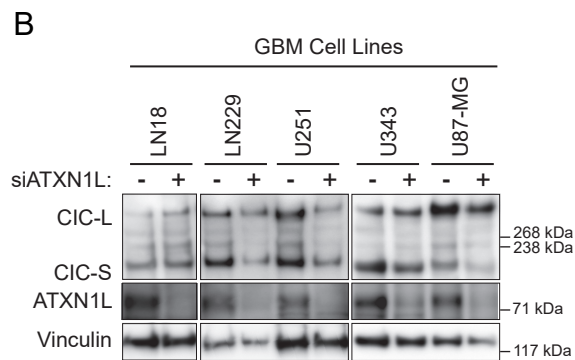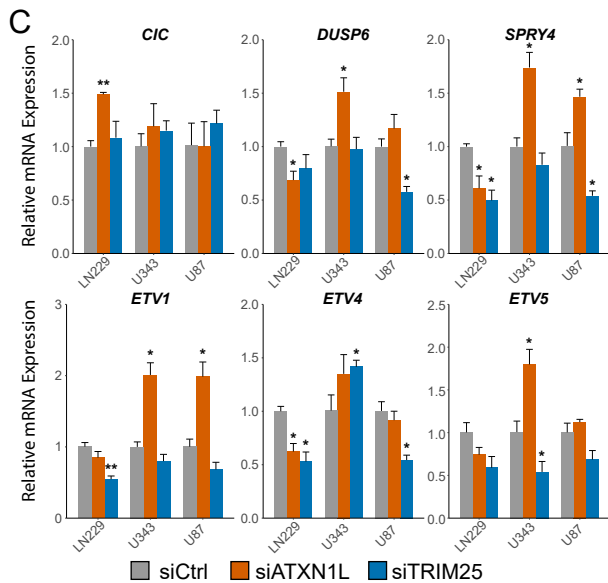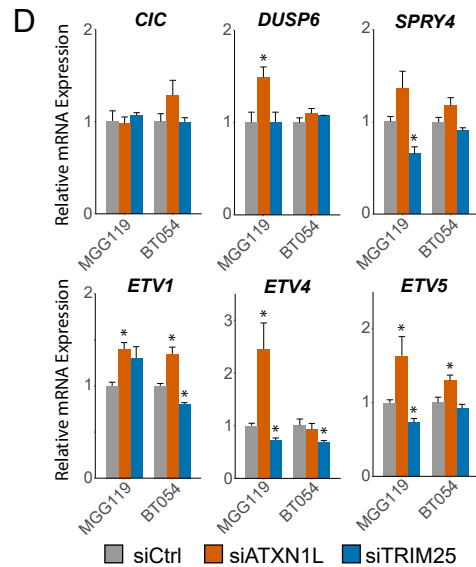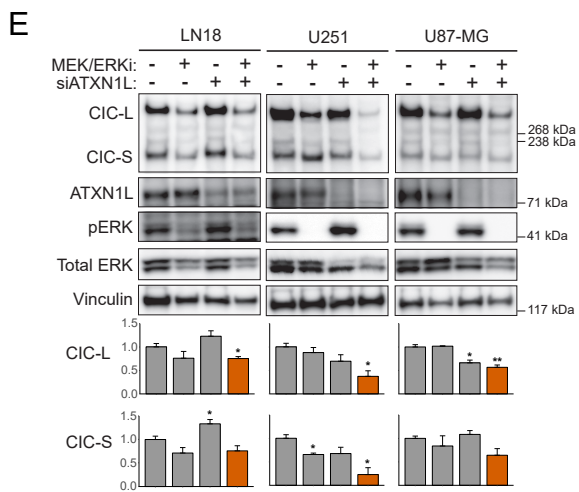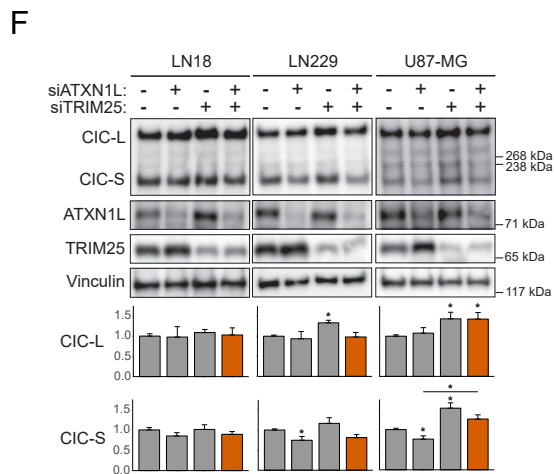

Supplement: 12915_2020_895_MOESM7_ESM.pdf [file 12915_2020_895_MOESM7_ESM.pdf]
